# Supplementary material
Source: publisher figshare collection journal article supplement (https://karger.figshare.com/ndownloader/files/7841560)
Supplement: Supplementary file 1 [file 7841560]

| **Table S1.** Sequences of primers in this study | | | | |
| --- | --- | --- | --- | --- |
|  |  |  |  |  |
| Primer name |  | Primers (5'-3') |  | Purpose |
| RECF-F |  | ATCGGATCCCGACAGAGTGCGGTATTTAG |  | Forward primer of P-W, P-S and P-WPD promoter-associated sequences. |
| IS26-F |  | ATCGGATCCCATTTCAAAAACTCTGCTTAC |  | Forward primer of P-IS promoter-associated sequence. |
| RECF-R-SHV |  | TACACAGGCGAATATAACGC |  | Reverse primer of P-W, P-S, P-IS and P-WPD promoter-associated sequences. Not apply for *bla*SHV-28 and *bla*SHV-36. |
| RECF-R-SHV-28 |  | TACACAGGCGAATAAAACGC |  | Reverse primer of P-W, P-S, P-IS and P-WPD promoter-associated sequences for *bla*SHV-28. |
| RECF-R-SHV-36 |  | TACACAGGCGAACATAACGC |  | Reverse primer of P-W, P-S, P-IS and P-WPD promoter-associated sequences *bla*SHV-36. |
| SHV-F |  | ATGCGTTATATTCGCCTGTGTATT |  | 5'-end of *bla*SHV-5,12,27,38,42 gene, forward primer |
| SHV-F-28 |  | ATGCGTTTTATTCGCCTGTGTATT |  | 5'-end of *bla*SHV-28 gene, forward primer |
| SHV-F-36 |  | ATGCGTTATGTTCGCCTGTGTATT |  | 5'-end of *bla*SHV-36 gene, forward primer |
| SHV-R |  | CGACTCGAGTTAGCGTTGCCAGTGCTCGATCAGCG |  | 3'-end of *bla*SHV gene, reverse primer |
